# Supplementary material for: Highly dispersed Ni-decorated porous hollow carbon nanofibers: fabrication, characterization, and NOx gas sensors at room temperature
Source: Royal Society of Chemistry journal article supplement (doi:10.1039/c2jm34288j), 2012-01-01
Supplement: c2jm34288j.pdf [file c2jm34288j.pdf]

# Highly Dispersed Ni-decorated Porous Hollow Carbon Nanofibers: Fabrication, Characterization, and NO<sub>x</sub> Gas Sensors at Room Temperature

*Renjiang Lü<sup>a,b</sup>, Keying Shi<sup>a</sup>, Wei Zhou<sup>a</sup>, Lei Wang<sup>a</sup>, Chungui Tian<sup>a</sup>, Kai Pan<sup>a</sup>, Li Sun<sup>a</sup>,*

*Honggang Fu<sup>a\*</sup>*

<sup>a</sup> Key Laboratory of Functional Inorganic Material Chemistry, Ministry of Education of the People's Republic of China, Heilongjiang University, Harbin 150080 P. R. China Tel.: +86 451 8660 4330, Fax: +86 451 8667 3647, E-mail: fuhg@vip.sina.com.

<sup>b</sup> College of Chemistry and Chemical Engineering, Qiqihar University, Qiqihar 161006, P. R. China

## Supporting information

### 1. SEM images

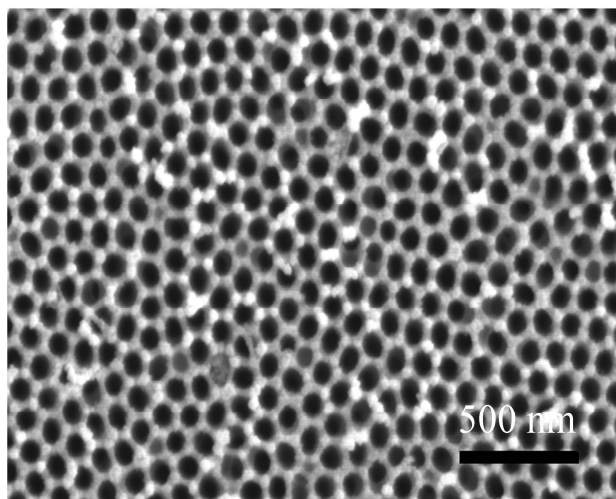

Fig. S1 SEM images of the prepared AAO membrane with ~60 nm pore diameters ( top view ).

### 2. XRD patterns

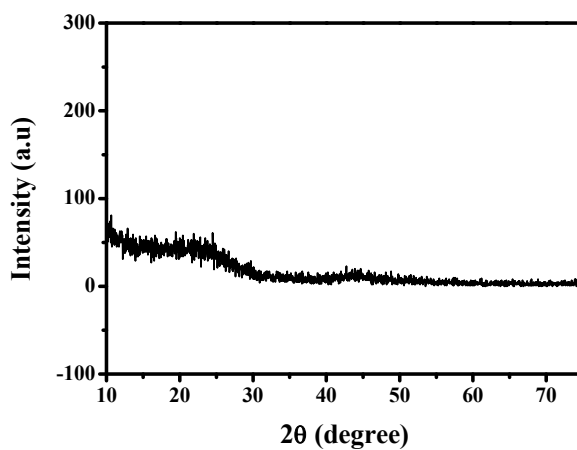

Fig. S2 Wide-angle XRD patterns of the samples (without Ni precursors) calcined at temperatures 800 °C.

### 3. EDX spectrum

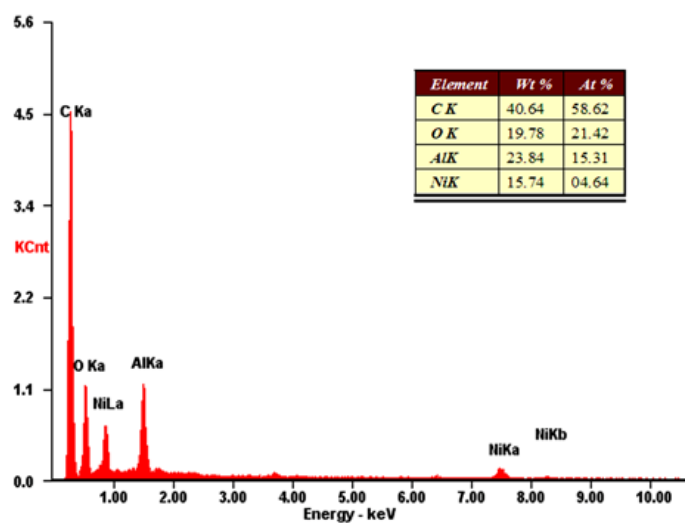

Fig. S3 Typical EDX spectrum of HCFs-Ni-NPs ( S-2-600 ).

### 4. Response-recovery curves

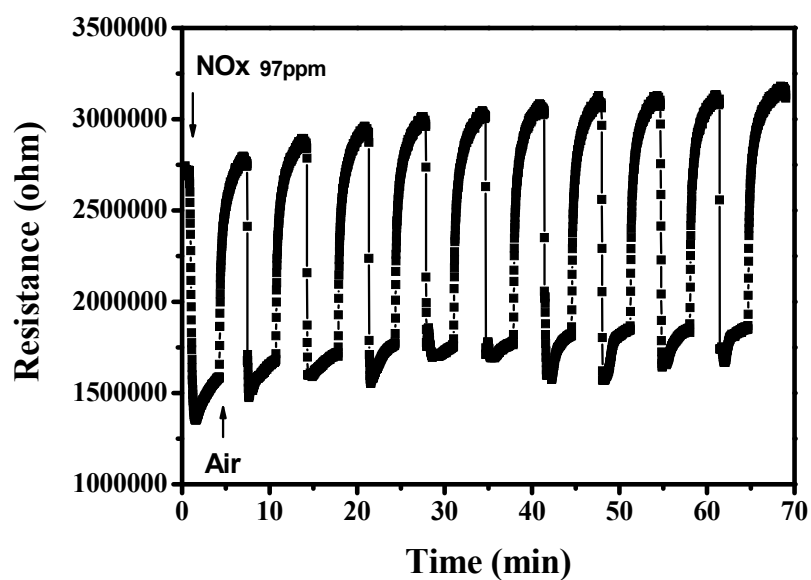

Fig. S4 Response-recovery curves of fabricated HCFs-Ni-NPs gas sensor ( S-2-600 ) to  $\text{NO}_x$  gas at 97 ppm (10 cycles ) at room temperature.

## 5. Response-recovery curves

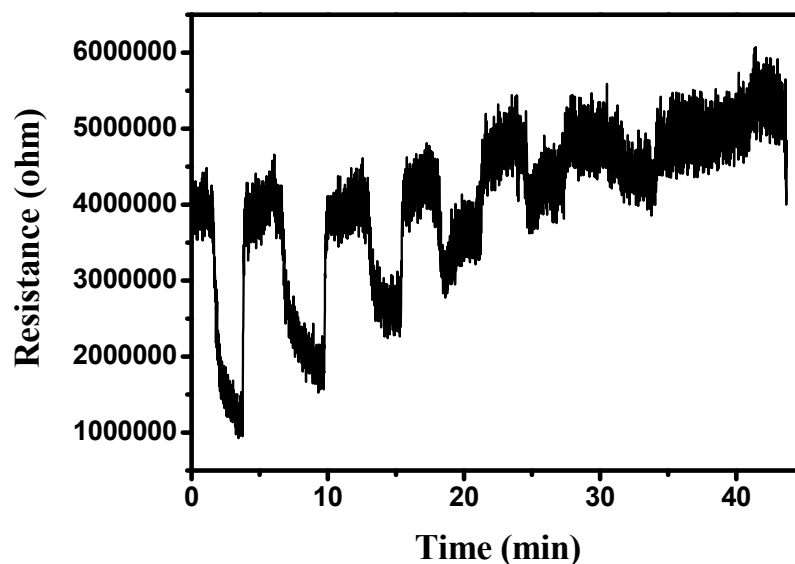

Fig. S5 Response-recovery curves of HCFs gas sensor to NO<sub>x</sub> gas at 97-0.97 ppm at the room temperature. ( S-2, removing Ni-NPs after annealing at 600 °C ).

## 6. Table of the amount of Ni

Table S1 The amount of Ni in the products

| The sample | The content of Ni in the products (wt%) |
|------------|-----------------------------------------|
| S-1-600    | 3.83                                    |
| S-2-600    | 9.37                                    |
| S-3-600    | 19.57                                   |
| S-4-600    | 33.04                                   |

## 7. HR-TEM images

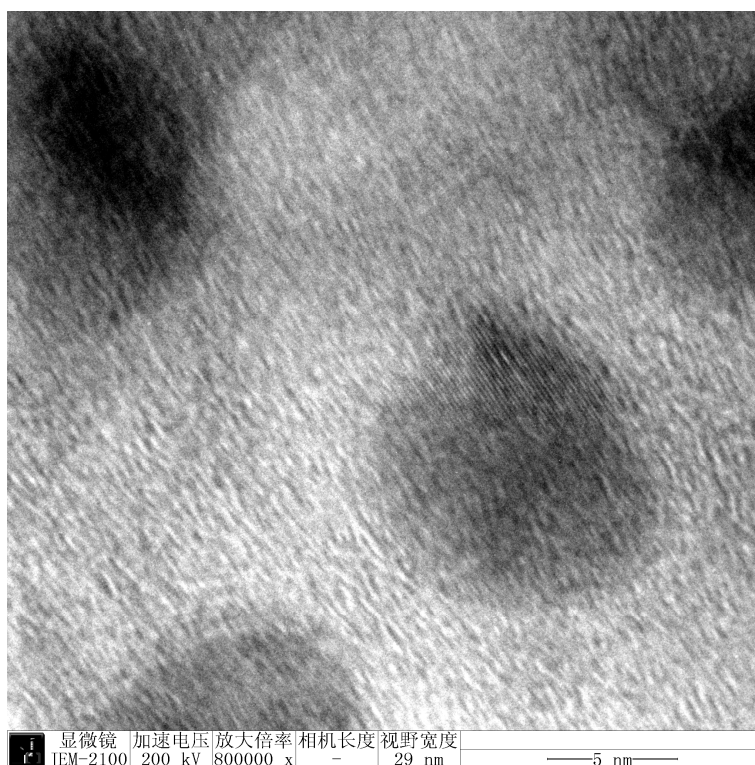

**Fig. S6 HR-TEM images of the HCF-Ni-NPs (the original image of Figure 3c).**
